# Supplementary material
Source: Springer Nature journal article supplement (https://www.springermedizin.de/resource/supplementary/12889_2013_6050_MOESM3_ESM.docx/9494172)
Supplement: MOESM3 [file 9494172]

**Figure 2: Presentation of diagnosis and drug prescriptions**
